# Supplementary material
Source: HighWire-hosted journal article supplement (doi:10.1101/rna.062927.117)
Supplement: Supplemental_Figure_Legends.docx [file Supplemental_Figure_Legends.docx]

**Supplemental Figure 1.** The high-confidence SSU biogenesis factor interactome. All 363 high-confidence PPIs were imported into Cytoscape and mapped, resulting in a single, continuous network of high-confidence interactions. Two lines between proteins indicate a reciprocal interaction. Hexagon=GTPase; diamond=helicase; octagon=kinase; square=methyltransferase; parallelogram=nuclease; circle=no known enzymatic function.

**Supplemental Figure 2.** Glycerol gradient sedimentation protein standard analysis provides mass estimates for subcomplexes. Catalase, apoferritin, and thyroglobulin were run on 10%-30% glycerol gradients and analyzed by silver stain (catalase and apoferritin) or Coomassie (thyroglobulin). Average peak fractions were plotted using GraphPad Prism 7, and nonlinear regression was used to graph the best- fit line. The resultant equation (y=101.26e0.1641x , where x=fraction number; R2=0.99997) was used to extrapolate the size of subcomplexes running in each fraction.

**Supplemental Figure 3.** Glycerol gradient sedimentation profiles of additional SPAFs. SPAFs were endogenously tagged in YPH499, and yeast extracts were run on 10%-30% glycerol gradients, as in Figure 5. Western blot analysis revealed the presence of previously undescribed subcomplexes. Estimated sizes of subcomplexes were determined using size standards (Supplemental Figure 2).

**Supplemental Figure 4.** Additional SSU processome subcomplexes persist in the absence of RNA. Glycerol gradient analysis as in Fig. 5.
