# Supplementary material
Source: HighWire-hosted journal article supplement (doi:10.1101/rna.062927.117)
Supplement: Supplemental_Table_1_Viability_and_Conservation.xlsx [file Supplemental_Table_1_Viability_and_Conservation.xlsx]

## Sheet: Sheet1
SSU processome component	Essential in yeast?	Conserved to humans?
Bms1	Y	Y
Cka1	N	Y
Cka2	N	Y
Ckb1	N	Y
Ckb2	N	Y
Dbp4	Y	Y
Dbp8	Y	Y
Dhi1	Y	Y
Dhr1	Y	Y
Dhr2	Y	Y
Emg1	Y	Y
Enp1	Y	Y
Esf1	Y	Y
Esf2	Y	Y
Fal1	Y	Y
Fyv7	N	N
Gno1	N	Y
Has1	Y	Y
Imp3	Y	Y
Imp4	Y	Y
Kre33	Y	Y
Krr1	Y	Y
Lcp5	Y	Y
Ltv1	N	Y
Mpp10	Y	Y
Mrd1	Y	Y
Mrt4	N	Y
Nop1	Y	Y
Nop5/58	Y	Y
Nop56	Y	Y
Nop6	N	N
Nop9	Y	Y
Nsr1	N	Y
Pfa1	N	Y
Pol5	Y	Y
Prp43	Y	Y
Rcl1	Y	Y
Rok1	Y	Y
Rrp3	Y	Y
Rrp36	Y	Y
Rrp5	Y	Y
Rrp7	Y	Y
Rrp9	Y	Y
Sen1	Y	Y
Sgd1	Y	Y
Slx9	N	Y
Snu13	Y	Y
Sof1	Y	Y
Utp1	Y	Y
Utp2	Y	Y
Utp3	Y	Y
Utp4	Y	Y
Utp5	Y	Y
Utp6	Y	Y
Utp7	Y	Y
Utp8	Y	N
Utp9	Y	N
Utp10	Y	Y
Utp11	Y	Y
Utp12	Y	Y
Utp13	Y	Y
Utp14	Y	Y
Utp15	Y	Y
Utp16	N	N
Utp17	Y	Y
Utp18	Y	Y
Utp19	Y	Y
Utp20	Y	Y
Utp21	Y	Y
Utp22	Y	Y
Utp23	Y	Y
Utp24	Y	Y
Utp25	Y	Y
Utp30	N	Y
