# Supplementary material
Source: HighWire-hosted journal article supplement (doi:10.1101/rna.062927.117)
Supplement: Supplemental_Table_3_High_Confidence_Y2H_Interactions.xlsx [file Supplemental_Table_3_High_Confidence_Y2H_Interactions.xlsx]

## Sheet: Sheet1
Experimental Role (Bait)	Accession Number Uniprot	ORF	Participant Name	Experimental Role (Prey)	Accession Number Uniprot	ORF	Participant Name	Confidence Score
MI:0496	P43639	YGL019W	Ckb1	MI:0498	P20448	YJL033W	Dbp4	0.6
MI:0496	P43639	YGL019W	Ckb1	MI:0498	P53941	YNL075W	Imp4	0.6
MI:0496	P43639	YGL019W	Ckb1	MI:0498	P25368	YCL031C	Rrp7	0.6
MI:0496	P43639	YGL019W	Ckb1	MI:0498	Q06512	YPR144C	Utp19	0.6
MI:0496	P38333	YBR247C	Enp1	MI:0498	Q12136	YDL153C	Utp3	0.6
MI:0496	P47077	YJL010C	Nop9	MI:0498	Q12136	YDL153C	Utp3	0.6
MI:0496	P27476	YGR159C	Nsr1	MI:0498	P53335	YGR280C	Gno1	0.6
MI:0496	P53866	YNL224C	Pfa1	MI:0498	P53335	YGR280C	Gno1	0.6
MI:0496	Q12481	YOR287C	Rrp36	MI:0498	P53317	YGR251W	Dhi1	0.6
MI:0496	P40362	YJL069C	Utp18	MI:0498	P25368	YCL031C	Rrp7	0.6
MI:0496	P40362	YJL069C	Utp18	MI:0498	P53251	YGR081C	Slx9	0.6
MI:0496	P40362	YJL069C	Utp18	MI:0498	Q99207	YDL148C	Utp2	0.6
MI:0496	P20448	YJL033W	Dbp4	MI:0498	P40362	YJL069C	Utp18	0.61
MI:0496	P36009	YKL078W	Dhr2	MI:0498	P25586	YCL059C	Krr1	0.61
MI:0496	Q99207	YDL148C	Utp2	MI:0498	Q99207	YDL148C	Utp2	0.61
MI:0496	Q12339	YOR004W	Utp23	MI:0498	Q04177	YDR398W	Utp5	0.61
MI:0496	P15790	YIL035C	Cka1	MI:0498	P15790	YIL035C	Cka1	0.63
MI:0496	P15790	YIL035C	Cka1	MI:0498	Q06132	YLR336C	Sgd1	0.63
MI:0496	P15790	YIL035C	Cka1	MI:0498	P40362	YJL069C	Utp18	0.63
MI:0496	P19454	YOR061W	Cka2	MI:0498	P19454	YOR061W	Cka2	0.63
MI:0496	P19454	YOR061W	Cka2	MI:0498	P36009	YKL078W	Dhr2	0.63
MI:0496	P19454	YOR061W	Cka2	MI:0498	P34247	YKL099C	Utp11	0.63
MI:0496	P20448	YJL033W	Dbp4	MI:0498	P53866	YNL224C	Pfa1	0.63
MI:0496	P53317	YGR251W	Dhi1	MI:0498	P53866	YNL224C	Pfa1	0.63
MI:0496	P38333	YBR247C	Enp1	MI:0498	P25586	YCL059C	Krr1	0.63
MI:0496	P38333	YBR247C	Enp1	MI:0498	Q12481	YOR287C	Rrp36	0.63
MI:0496	Q03532	YMR290C	Has1	MI:0498	Q06344	YDR365C	Esf1	0.63
MI:0496	Q03532	YMR290C	Has1	MI:0498	P25586	YCL059C	Krr1	0.63
MI:0496	Q03532	YMR290C	Has1	MI:0498	Q12481	YOR287C	Rrp36	0.63
MI:0496	Q03532	YMR290C	Has1	MI:0498	P53251	YGR081C	Slx9	0.63
MI:0496	P25586	YCL059C	Krr1	MI:0498	Q04500	YML093W	Utp14	0.63
MI:0496	P40079	YER127W	Lcp5	MI:0498	P36009	YKL078W	Dhr2	0.63
MI:0496	P40079	YER127W	Lcp5	MI:0498	P40079	YER127W	Lcp5	0.63
MI:0496	P40079	YER127W	Lcp5	MI:0498	Q06132	YLR336C	Sgd1	0.63
MI:0496	P40079	YER127W	Lcp5	MI:0498	Q06512	YPR144C	Utp19	0.63
MI:0496	P53866	YNL224C	Pfa1	MI:0498	P53254	YGR090W	Utp22	0.63
MI:0496	P53866	YNL224C	Pfa1	MI:0498	Q12136	YDL153C	Utp3	0.63
MI:0496	P53131	YGL120C	Prp43	MI:0498	P36009	YKL078W	Dhr2	0.63
MI:0496	P53131	YGL120C	Prp43	MI:0498	Q12136	YDL153C	Utp3	0.63
MI:0496	P38712	YHR065C	Rrp3	MI:0498	Q06344	YDR365C	Esf1	0.63
MI:0496	Q06132	YLR336C	Sgd1	MI:0498	P53335	YGR280C	Gno1	0.63
MI:0496	Q06132	YLR336C	Sgd1	MI:0498	P53866	YNL224C	Pfa1	0.63
MI:0496	Q06132	YLR336C	Sgd1	MI:0498	Q06132	YLR336C	Sgd1	0.63
MI:0496	Q06132	YLR336C	Sgd1	MI:0498	P53251	YGR081C	Slx9	0.63
MI:0496	Q06132	YLR336C	Sgd1	MI:0498	P40362	YJL069C	Utp18	0.63
MI:0496	P53251	YGR081C	Slx9	MI:0498	P25586	YCL059C	Krr1	0.63
MI:0496	P34247	YKL099C	Utp11	MI:0498	P15646	YDL014W	Nop1	0.63
MI:0496	Q04500	YML093W	Utp14	MI:0498	P42945	YJL109C	Utp10	0.63
MI:0496	Q99207	YDL148C	Utp2	MI:0498	P47083	YJR002W	Mpp10	0.63
MI:0496	Q99207	YDL148C	Utp2	MI:0498	Q06512	YPR144C	Utp19	0.63
MI:0496	P53254	YGR090W	Utp22	MI:0498	P20448	YJL033W	Dbp4	0.63
MI:0496	P53254	YGR090W	Utp22	MI:0498	P53866	YNL224C	Pfa1	0.63
MI:0496	P53254	YGR090W	Utp22	MI:0498	P35194	YBL004W	Utp20	0.63
MI:0496	P53254	YGR090W	Utp22	MI:0498	Q05498	YDR339C	Utp24	0.63
MI:0496	Q12136	YDL153C	Utp3	MI:0498	P20448	YJL033W	Dbp4	0.63
MI:0496	Q12136	YDL153C	Utp3	MI:0498	P25586	YCL059C	Krr1	0.63
MI:0496	Q12136	YDL153C	Utp3	MI:0498	Q06512	YPR144C	Utp19	0.63
MI:0496	Q04177	YDR398W	Utp5	MI:0498	P32899	YHR148W	Imp3	0.63
MI:0496	Q04177	YDR398W	Utp5	MI:0498	Q04177	YDR398W	Utp5	0.63
MI:0496	Q02354	YDR449C	Utp6	MI:0498	Q08965	YPL217C	Bms1	0.63
MI:0496	Q02354	YDR449C	Utp6	MI:0498	Q06512	YPR144C	Utp19	0.63
MI:0496	P43639	YGL019W	Ckb1	MI:0498	P43639	YGL019W	Ckb1	0.64
MI:0496	P53131	YGL120C	Prp43	MI:0498	P53335	YGR280C	Gno1	0.64
MI:0496	Q06078	YLR409C	Utp21	MI:0498	P40362	YJL069C	Utp18	0.64
MI:0496	P40498	YIL091C	Utp25	MI:0498	Q06078	YLR409C	Utp21	0.64
MI:0496	P15646	YDL014W	Nop1	MI:0498	P39990	YEL026W	Snu13	0.64
MI:0496	Q12460	YLR197W	Nop56	MI:0498	P39990	YEL026W	Snu13	0.64
MI:0496	P53131	YGL120C	Prp43	MI:0498	P53866	YNL224C	Pfa1	0.64
MI:0496	P25635	YCR057C	Utp1	MI:0498	Q06078	YLR409C	Utp21	0.64
MI:0496	P42945	YJL109C	Utp10	MI:0498	P53276	YGR128C	Utp8	0.64
MI:0496	Q02931	YPL126W	Utp17	MI:0498	Q02931	YPL126W	Utp17	0.64
MI:0496	Q06078	YLR409C	Utp21	MI:0498	P25635	YCR057C	Utp1	0.64
MI:0496	Q12247	YLR068W	Fyv7	MI:0498	P36009	YKL078W	Dhr2	0.65
MI:0496	P47083	YJR002W	Mpp10	MI:0498	P47083	YJR002W	Mpp10	0.65
MI:0496	P38719	YHR169W	Dbp8	MI:0498	P53254	YGR090W	Utp22	0.68
MI:0496	P36009	YKL078W	Dhr2	MI:0498	P32899	YHR148W	Imp3	0.68
MI:0496	P32899	YHR148W	Imp3	MI:0498	P36009	YKL078W	Dhr2	0.68
MI:0496	P25586	YCL059C	Krr1	MI:0498	Q12339	YOR004W	Utp23	0.68
MI:0496	Q06078	YLR409C	Utp21	MI:0498	P36009	YKL078W	Dhr2	0.68
MI:0496	Q12136	YDL153C	Utp3	MI:0498	P45818	YGL171W	Rok1	0.68
MI:0496	Q12136	YDL153C	Utp3	MI:0498	P34247	YKL099C	Utp11	0.68
MI:0496	Q12220	YLR129W	Utp12	MI:0498	P25635	YCR057C	Utp1	0.69
MI:0496	Q04217	YMR128W	Dhr1	MI:0498	Q02354	YDR449C	Utp6	0.7
MI:0496	Q06344	YDR365C	Esf1	MI:0498	P36009	YKL078W	Dhr2	0.7
MI:0496	P53335	YGR280C	Gno1	MI:0498	P40055	YER082C	Utp7	0.7
MI:0496	P47083	YJR002W	Mpp10	MI:0498	P42945	YJL109C	Utp10	0.7
MI:0496	P53866	YNL224C	Pfa1	MI:0498	P32899	YHR148W	Imp3	0.7
MI:0496	P38712	YHR065C	Rrp3	MI:0498	Q12136	YDL153C	Utp3	0.7
MI:0496	Q06132	YLR336C	Sgd1	MI:0498	P36144	YKR060W	Utp30	0.7
MI:0496	P25635	YCR057C	Utp1	MI:0498	Q12136	YDL153C	Utp3	0.7
MI:0496	Q05946	YLR222C	Utp13	MI:0498	P53254	YGR090W	Utp22	0.7
MI:0496	Q04500	YML093W	Utp14	MI:0498	P53914	YNL132W	Kre33	0.7
MI:0496	Q06512	YPR144C	Utp19	MI:0498	Q12136	YDL153C	Utp3	0.7
MI:0496	P53254	YGR090W	Utp22	MI:0498	Q06506	YPR137W	Rrp9	0.7
MI:0496	P15646	YDL014W	Nop1	MI:0498	Q12460	YLR197W	Nop56	0.71
MI:0496	Q99207	YDL148C	Utp2	MI:0498	P53866	YNL224C	Pfa1	0.72
MI:0496	Q05946	YLR222C	Utp13	MI:0498	P53317	YGR251W	Dhi1	0.75
MI:0496	P15790	YIL035C	Cka1	MI:0498	P25368	YCL031C	Rrp7	0.75
MI:0496	P38719	YHR169W	Dbp8	MI:0498	Q12136	YDL153C	Utp3	0.75
MI:0496	P36009	YKL078W	Dhr2	MI:0498	P53941	YNL075W	Imp4	0.75
MI:0496	P47083	YJR002W	Mpp10	MI:0498	P53254	YGR090W	Utp22	0.75
MI:0496	Q06132	YLR336C	Sgd1	MI:0498	Q12220	YLR129W	Utp12	0.75
MI:0496	P42945	YJL109C	Utp10	MI:0498	P40079	YER127W	Lcp5	0.75
MI:0496	P42945	YJL109C	Utp10	MI:0498	Q12136	YDL153C	Utp3	0.75
MI:0496	P40362	YJL069C	Utp18	MI:0498	P32899	YHR148W	Imp3	0.75
MI:0496	P40362	YJL069C	Utp18	MI:0498	P36144	YKR060W	Utp30	0.75
MI:0496	Q12136	YDL153C	Utp3	MI:0498	P40055	YER082C	Utp7	0.75
MI:0496	P40362	YJL069C	Utp18	MI:0498	P25635	YCR057C	Utp1	0.75
MI:0496	P53743	YNR054C	Esf2	MI:0498	P38719	YHR169W	Dbp8	0.76
MI:0496	P53335	YGR280C	Gno1	MI:0498	P53335	YGR280C	Gno1	0.76
MI:0496	Q12136	YDL153C	Utp3	MI:0498	Q02354	YDR449C	Utp6	0.76
MI:0496	P15790	YIL035C	Cka1	MI:0498	P20448	YJL033W	Dbp4	0.77
MI:0496	P15790	YIL035C	Cka1	MI:0498	P25586	YCL059C	Krr1	0.77
MI:0496	P15790	YIL035C	Cka1	MI:0498	Q12481	YOR287C	Rrp36	0.77
MI:0496	P15790	YIL035C	Cka1	MI:0498	P40055	YER082C	Utp7	0.77
MI:0496	P38712	YHR065C	Rrp3	MI:0498	P40079	YER127W	Lcp5	0.77
MI:0496	Q06132	YLR336C	Sgd1	MI:0498	Q06512	YPR144C	Utp19	0.77
MI:0496	Q04500	YML093W	Utp14	MI:0498	P20448	YJL033W	Dbp4	0.77
MI:0496	Q04500	YML093W	Utp14	MI:0498	Q12136	YDL153C	Utp3	0.77
MI:0496	Q04500	YML093W	Utp14	MI:0498	Q02354	YDR449C	Utp6	0.77
MI:0496	Q99207	YDL148C	Utp2	MI:0498	P36009	YKL078W	Dhr2	0.77
MI:0496	Q04177	YDR398W	Utp5	MI:0498	P40055	YER082C	Utp7	0.77
MI:0496	Q02354	YDR449C	Utp6	MI:0498	P25586	YCL059C	Krr1	0.77
MI:0496	P15790	YIL035C	Cka1	MI:0498	P40079	YER127W	Lcp5	0.77
MI:0496	P43639	YGL019W	Ckb1	MI:0498	Q12481	YOR287C	Rrp36	0.77
MI:0496	P43639	YGL019W	Ckb1	MI:0498	P34247	YKL099C	Utp11	0.77
MI:0496	P43639	YGL019W	Ckb1	MI:0498	Q04305	YMR093W	Utp15	0.77
MI:0496	P43639	YGL019W	Ckb1	MI:0498	Q05498	YDR339C	Utp24	0.77
MI:0496	P38719	YHR169W	Dbp8	MI:0498	P36009	YKL078W	Dhr2	0.77
MI:0496	Q12099	YDR021W	Fal1	MI:0498	P36009	YKL078W	Dhr2	0.77
MI:0496	P27476	YGR159C	Nsr1	MI:0498	P15646	YDL014W	Nop1	0.77
MI:0496	Q05946	YLR222C	Utp13	MI:0498	Q02354	YDR449C	Utp6	0.77
MI:0496	Q04500	YML093W	Utp14	MI:0498	P36009	YKL078W	Dhr2	0.77
MI:0496	P40362	YJL069C	Utp18	MI:0498	P40079	YER127W	Lcp5	0.77
MI:0496	P40498	YIL091C	Utp25	MI:0498	P47083	YJR002W	Mpp10	0.78
MI:0496	P20448	YJL033W	Dbp4	MI:0498	P20448	YJL033W	Dbp4	0.78
MI:0496	P53317	YGR251W	Dhi1	MI:0498	P53254	YGR090W	Utp22	0.78
MI:0496	Q04217	YMR128W	Dhr1	MI:0498	P53254	YGR090W	Utp22	0.78
MI:0496	P32899	YHR148W	Imp3	MI:0498	Q12136	YDL153C	Utp3	0.78
MI:0496	Q99207	YDL148C	Utp2	MI:0498	P53254	YGR090W	Utp22	0.78
MI:0496	P15646	YDL014W	Nop1	MI:0498	P53335	YGR280C	Gno1	0.79
MI:0496	P53866	YNL224C	Pfa1	MI:0498	P36144	YKR060W	Utp30	0.79
MI:0496	Q04217	YMR128W	Dhr1	MI:0498	Q04500	YML093W	Utp14	0.79
MI:0496	P43639	YGL019W	Ckb1	MI:0498	P40055	YER082C	Utp7	0.79
MI:0496	P39990	YEL026W	Snu13	MI:0498	P53335	YGR280C	Gno1	0.79
MI:0496	P40362	YJL069C	Utp18	MI:0498	P53743	YNR054C	Esf2	0.79
MI:0496	P40498	YIL091C	Utp25	MI:0498	P53941	YNL075W	Imp4	0.79
MI:0496	P20448	YJL033W	Dbp4	MI:0498	Q12136	YDL153C	Utp3	0.8
MI:0496	P15790	YIL035C	Cka1	MI:0498	P53317	YGR251W	Dhi1	0.84
MI:0496	P15790	YIL035C	Cka1	MI:0498	P53743	YNR054C	Esf2	0.84
MI:0496	P15790	YIL035C	Cka1	MI:0498	P32899	YHR148W	Imp3	0.84
MI:0496	P15790	YIL035C	Cka1	MI:0498	P53251	YGR081C	Slx9	0.84
MI:0496	P19454	YOR061W	Cka2	MI:0498	P53317	YGR251W	Dhi1	0.84
MI:0496	P43639	YGL019W	Ckb1	MI:0498	P53317	YGR251W	Dhi1	0.84
MI:0496	P43639	YGL019W	Ckb1	MI:0498	P36009	YKL078W	Dhr2	0.84
MI:0496	P43639	YGL019W	Ckb1	MI:0498	P32899	YHR148W	Imp3	0.84
MI:0496	P43639	YGL019W	Ckb1	MI:0498	P25586	YCL059C	Krr1	0.84
MI:0496	P43639	YGL019W	Ckb1	MI:0498	P53251	YGR081C	Slx9	0.84
MI:0496	P43639	YGL019W	Ckb1	MI:0498	Q06078	YLR409C	Utp21	0.84
MI:0496	P43639	YGL019W	Ckb1	MI:0498	P53254	YGR090W	Utp22	0.84
MI:0496	P43639	YGL019W	Ckb1	MI:0498	Q02354	YDR449C	Utp6	0.84
MI:0496	P53317	YGR251W	Dhi1	MI:0498	P53743	YNR054C	Esf2	0.84
MI:0496	P38333	YBR247C	Enp1	MI:0498	P36009	YKL078W	Dhr2	0.84
MI:0496	P38333	YBR247C	Enp1	MI:0498	P32899	YHR148W	Imp3	0.84
MI:0496	P38333	YBR247C	Enp1	MI:0498	P53941	YNL075W	Imp4	0.84
MI:0496	P38333	YBR247C	Enp1	MI:0498	Q06078	YLR409C	Utp21	0.84
MI:0496	P38333	YBR247C	Enp1	MI:0498	P53254	YGR090W	Utp22	0.84
MI:0496	Q12099	YDR021W	Fal1	MI:0498	P53335	YGR280C	Gno1	0.84
MI:0496	Q12099	YDR021W	Fal1	MI:0498	P40079	YER127W	Lcp5	0.84
MI:0496	P25586	YCL059C	Krr1	MI:0498	P53743	YNR054C	Esf2	0.84
MI:0496	P27476	YGR159C	Nsr1	MI:0498	P53743	YNR054C	Esf2	0.84
MI:0496	P27476	YGR159C	Nsr1	MI:0498	Q12460	YLR197W	Nop56	0.84
MI:0496	P53866	YNL224C	Pfa1	MI:0498	Q02354	YDR449C	Utp6	0.84
MI:0496	P53131	YGL120C	Prp43	MI:0498	P53743	YNR054C	Esf2	0.84
MI:0496	Q12481	YOR287C	Rrp36	MI:0498	P53743	YNR054C	Esf2	0.84
MI:0496	Q06132	YLR336C	Sgd1	MI:0498	P36009	YKL078W	Dhr2	0.84
MI:0496	Q06132	YLR336C	Sgd1	MI:0498	P53743	YNR054C	Esf2	0.84
MI:0496	Q06132	YLR336C	Sgd1	MI:0498	P47083	YJR002W	Mpp10	0.84
MI:0496	Q06132	YLR336C	Sgd1	MI:0498	Q12136	YDL153C	Utp3	0.84
MI:0496	P42945	YJL109C	Utp10	MI:0498	Q06512	YPR144C	Utp19	0.84
MI:0496	P40362	YJL069C	Utp18	MI:0498	P53317	YGR251W	Dhi1	0.84
MI:0496	P40362	YJL069C	Utp18	MI:0498	P36009	YKL078W	Dhr2	0.84
MI:0496	P40362	YJL069C	Utp18	MI:0498	P53914	YNL132W	Kre33	0.84
MI:0496	P40362	YJL069C	Utp18	MI:0498	P25586	YCL059C	Krr1	0.84
MI:0496	P40362	YJL069C	Utp18	MI:0498	Q12136	YDL153C	Utp3	0.84
MI:0496	Q99207	YDL148C	Utp2	MI:0498	P53743	YNR054C	Esf2	0.84
MI:0496	P53254	YGR090W	Utp22	MI:0498	P25368	YCL031C	Rrp7	0.84
MI:0496	P40498	YIL091C	Utp25	MI:0498	P36009	YKL078W	Dhr2	0.84
MI:0496	P40498	YIL091C	Utp25	MI:0498	P53743	YNR054C	Esf2	0.84
MI:0496	P40498	YIL091C	Utp25	MI:0498	P40079	YER127W	Lcp5	0.84
MI:0496	P40498	YIL091C	Utp25	MI:0498	P53866	YNL224C	Pfa1	0.84
MI:0496	P40498	YIL091C	Utp25	MI:0498	Q12481	YOR287C	Rrp36	0.84
MI:0496	P40498	YIL091C	Utp25	MI:0498	P53251	YGR081C	Slx9	0.84
MI:0496	Q04177	YDR398W	Utp5	MI:0498	P36009	YKL078W	Dhr2	0.84
MI:0496	Q04177	YDR398W	Utp5	MI:0498	P40079	YER127W	Lcp5	0.84
MI:0496	Q04177	YDR398W	Utp5	MI:0498	P53251	YGR081C	Slx9	0.84
MI:0496	Q02354	YDR449C	Utp6	MI:0498	P53251	YGR081C	Slx9	0.84
MI:0496	Q04177	YDR398W	Utp5	MI:0498	Q06078	YLR409C	Utp21	0.84
MI:0496	Q12136	YDL153C	Utp3	MI:0498	Q06078	YLR409C	Utp21	0.85
MI:0496	Q04177	YDR398W	Utp5	MI:0498	Q04305	YMR093W	Utp15	0.85
MI:0496	Q04177	YDR398W	Utp5	MI:0498	Q06679	YDR324C	Utp4	0.85
MI:0496	P53276	YGR128C	Utp8	MI:0498	Q06679	YDR324C	Utp4	0.85
MI:0496	P20448	YJL033W	Dbp4	MI:0498	P53254	YGR090W	Utp22	0.85
MI:0496	Q04217	YMR128W	Dhr1	MI:0498	P36009	YKL078W	Dhr2	0.85
MI:0496	Q04217	YMR128W	Dhr1	MI:0498	Q12136	YDL153C	Utp3	0.85
MI:0496	Q06344	YDR365C	Esf1	MI:0498	P53914	YNL132W	Kre33	0.85
MI:0496	P53914	YNL132W	Kre33	MI:0498	Q06344	YDR365C	Esf1	0.85
MI:0496	Q06132	YLR336C	Sgd1	MI:0498	P53914	YNL132W	Kre33	0.85
MI:0496	Q99207	YDL148C	Utp2	MI:0498	Q02354	YDR449C	Utp6	0.85
MI:0496	P40055	YER082C	Utp7	MI:0498	P42945	YJL109C	Utp10	0.85
MI:0496	P38333	YBR247C	Enp1	MI:0498	P38333	YBR247C	Enp1	0.87
MI:0496	Q06344	YDR365C	Esf1	MI:0498	Q06132	YLR336C	Sgd1	0.87
MI:0496	Q06344	YDR365C	Esf1	MI:0498	P53254	YGR090W	Utp22	0.87
MI:0496	P53251	YGR081C	Slx9	MI:0498	P53941	YNL075W	Imp4	0.87
MI:0496	P53251	YGR081C	Slx9	MI:0498	P53251	YGR081C	Slx9	0.87
MI:0496	P53254	YGR090W	Utp22	MI:0498	Q99207	YDL148C	Utp2	0.87
MI:0496	P15646	YDL014W	Nop1	MI:0498	P15646	YDL014W	Nop1	0.88
MI:0496	P25635	YCR057C	Utp1	MI:0498	P40079	YER127W	Lcp5	0.89
MI:0496	P15790	YIL035C	Cka1	MI:0498	Q06344	YDR365C	Esf1	0.92
MI:0496	P15790	YIL035C	Cka1	MI:0498	Q04500	YML093W	Utp14	0.92
MI:0496	P36009	YKL078W	Dhr2	MI:0498	P53866	YNL224C	Pfa1	0.92
MI:0496	P36009	YKL078W	Dhr2	MI:0498	P53254	YGR090W	Utp22	0.92
MI:0496	Q06344	YDR365C	Esf1	MI:0498	P20448	YJL033W	Dbp4	0.92
MI:0496	Q06344	YDR365C	Esf1	MI:0498	Q06344	YDR365C	Esf1	0.92
MI:0496	Q06344	YDR365C	Esf1	MI:0498	Q12136	YDL153C	Utp3	0.92
MI:0496	Q03532	YMR290C	Has1	MI:0498	P20448	YJL033W	Dbp4	0.92
MI:0496	P25586	YCL059C	Krr1	MI:0498	P25586	YCL059C	Krr1	0.92
MI:0496	P25586	YCL059C	Krr1	MI:0498	P15646	YDL014W	Nop1	0.92
MI:0496	P25586	YCL059C	Krr1	MI:0498	P53251	YGR081C	Slx9	0.92
MI:0496	P25586	YCL059C	Krr1	MI:0498	P53254	YGR090W	Utp22	0.92
MI:0496	P53866	YNL224C	Pfa1	MI:0498	P53866	YNL224C	Pfa1	0.92
MI:0496	Q06132	YLR336C	Sgd1	MI:0498	P20448	YJL033W	Dbp4	0.92
MI:0496	Q06132	YLR336C	Sgd1	MI:0498	P53317	YGR251W	Dhi1	0.92
MI:0496	Q06132	YLR336C	Sgd1	MI:0498	Q06344	YDR365C	Esf1	0.92
MI:0496	Q06132	YLR336C	Sgd1	MI:0498	Q12481	YOR287C	Rrp36	0.92
MI:0496	Q06132	YLR336C	Sgd1	MI:0498	Q06506	YPR137W	Rrp9	0.92
MI:0496	Q04500	YML093W	Utp14	MI:0498	Q04217	YMR128W	Dhr1	0.92
MI:0496	Q04500	YML093W	Utp14	MI:0498	Q03532	YMR290C	Has1	0.92
MI:0496	Q02354	YDR449C	Utp6	MI:0498	Q06132	YLR336C	Sgd1	0.92
MI:0496	P53317	YGR251W	Dhi1	MI:0498	Q12136	YDL153C	Utp3	0.92
MI:0496	P36009	YKL078W	Dhr2	MI:0498	Q12136	YDL153C	Utp3	0.92
MI:0496	Q06506	YPR137W	Rrp9	MI:0498	P36009	YKL078W	Dhr2	0.92
MI:0496	P40498	YIL091C	Utp25	MI:0498	P53254	YGR090W	Utp22	0.92
MI:0496	Q04177	YDR398W	Utp5	MI:0498	P38882	YHR196W	Utp9	0.93
MI:0496	Q06287	YLR186W	Emg1	MI:0498	Q99207	YDL148C	Utp2	0.93
MI:0496	Q06078	YLR409C	Utp21	MI:0498	Q02354	YDR449C	Utp6	0.93
MI:0496	Q04177	YDR398W	Utp5	MI:0498	P42945	YJL109C	Utp10	0.93
MI:0496	P25586	YCL059C	Krr1	MI:0498	Q12481	YOR287C	Rrp36	0.94
MI:0496	P47083	YJR002W	Mpp10	MI:0498	Q03532	YMR290C	Has1	0.94
MI:0496	P53866	YNL224C	Pfa1	MI:0498	P53317	YGR251W	Dhi1	0.94
MI:0496	Q12481	YOR287C	Rrp36	MI:0498	Q12136	YDL153C	Utp3	0.94
MI:0496	Q12220	YLR129W	Utp12	MI:0498	P53743	YNR054C	Esf2	0.94
MI:0496	P53254	YGR090W	Utp22	MI:0498	P25586	YCL059C	Krr1	0.94
MI:0496	P53254	YGR090W	Utp22	MI:0498	P53251	YGR081C	Slx9	0.94
MI:0496	Q12136	YDL153C	Utp3	MI:0498	Q99207	YDL148C	Utp2	0.94
MI:0496	P38333	YBR247C	Enp1	MI:0498	P53866	YNL224C	Pfa1	0.94
MI:0496	P39985	YEL055C	Pol5	MI:0498	P25586	YCL059C	Krr1	0.94
MI:0496	Q12481	YOR287C	Rrp36	MI:0498	P25586	YCL059C	Krr1	0.94
MI:0496	Q12460	YLR197W	Nop56	MI:0498	P15646	YDL014W	Nop1	0.95
MI:0496	P39990	YEL026W	Snu13	MI:0498	Q12460	YLR197W	Nop56	0.95
MI:0496	P15790	YIL035C	Cka1	MI:0498	P53335	YGR280C	Gno1	0.99
MI:0496	P15790	YIL035C	Cka1	MI:0498	P53254	YGR090W	Utp22	0.99
MI:0496	P20448	YJL033W	Dbp4	MI:0498	P53743	YNR054C	Esf2	0.99
MI:0496	P20448	YJL033W	Dbp4	MI:0498	Q12481	YOR287C	Rrp36	0.99
MI:0496	P38719	YHR169W	Dbp8	MI:0498	P53743	YNR054C	Esf2	0.99
MI:0496	P53317	YGR251W	Dhi1	MI:0498	P36009	YKL078W	Dhr2	0.99
MI:0496	P36009	YKL078W	Dhr2	MI:0498	P53317	YGR251W	Dhi1	0.99
MI:0496	P36009	YKL078W	Dhr2	MI:0498	P36009	YKL078W	Dhr2	0.99
MI:0496	P36009	YKL078W	Dhr2	MI:0498	P53335	YGR280C	Gno1	0.99
MI:0496	P36009	YKL078W	Dhr2	MI:0498	P40079	YER127W	Lcp5	0.99
MI:0496	P38333	YBR247C	Enp1	MI:0498	P53743	YNR054C	Esf2	0.99
MI:0496	P38333	YBR247C	Enp1	MI:0498	P53335	YGR280C	Gno1	0.99
MI:0496	P38333	YBR247C	Enp1	MI:0498	Q99207	YDL148C	Utp2	0.99
MI:0496	Q06344	YDR365C	Esf1	MI:0498	Q02354	YDR449C	Utp6	0.99
MI:0496	P53743	YNR054C	Esf2	MI:0498	P53743	YNR054C	Esf2	0.99
MI:0496	Q12099	YDR021W	Fal1	MI:0498	Q06132	YLR336C	Sgd1	0.99
MI:0496	Q03532	YMR290C	Has1	MI:0498	P53743	YNR054C	Esf2	0.99
MI:0496	Q03532	YMR290C	Has1	MI:0498	P47083	YJR002W	Mpp10	0.99
MI:0496	Q03532	YMR290C	Has1	MI:0498	P53866	YNL224C	Pfa1	0.99
MI:0496	Q03532	YMR290C	Has1	MI:0498	Q12136	YDL153C	Utp3	0.99
MI:0496	P53914	YNL132W	Kre33	MI:0498	P53914	YNL132W	Kre33	0.99
MI:0496	P25586	YCL059C	Krr1	MI:0498	P36009	YKL078W	Dhr2	0.99
MI:0496	P25586	YCL059C	Krr1	MI:0498	Q12136	YDL153C	Utp3	0.99
MI:0496	P47083	YJR002W	Mpp10	MI:0498	P36009	YKL078W	Dhr2	0.99
MI:0496	P53866	YNL224C	Pfa1	MI:0498	P20448	YJL033W	Dbp4	0.99
MI:0496	P53866	YNL224C	Pfa1	MI:0498	P36009	YKL078W	Dhr2	0.99
MI:0496	P53866	YNL224C	Pfa1	MI:0498	Q03532	YMR290C	Has1	0.99
MI:0496	P53866	YNL224C	Pfa1	MI:0498	P25586	YCL059C	Krr1	0.99
MI:0496	P53866	YNL224C	Pfa1	MI:0498	P53131	YGL120C	Prp43	0.99
MI:0496	P53866	YNL224C	Pfa1	MI:0498	Q12481	YOR287C	Rrp36	0.99
MI:0496	P53866	YNL224C	Pfa1	MI:0498	P53251	YGR081C	Slx9	0.99
MI:0496	P45818	YGL171W	Rok1	MI:0498	P53254	YGR090W	Utp22	0.99
MI:0496	Q12481	YOR287C	Rrp36	MI:0498	P20448	YJL033W	Dbp4	0.99
MI:0496	Q12481	YOR287C	Rrp36	MI:0498	Q12481	YOR287C	Rrp36	0.99
MI:0496	P25368	YCL031C	Rrp7	MI:0498	P25368	YCL031C	Rrp7	0.99
MI:0496	Q06506	YPR137W	Rrp9	MI:0498	Q12481	YOR287C	Rrp36	0.99
MI:0496	Q06132	YLR336C	Sgd1	MI:0498	Q12099	YDR021W	Fal1	0.99
MI:0496	Q06132	YLR336C	Sgd1	MI:0498	P25586	YCL059C	Krr1	0.99
MI:0496	Q06132	YLR336C	Sgd1	MI:0498	P40079	YER127W	Lcp5	0.99
MI:0496	Q06132	YLR336C	Sgd1	MI:0498	Q02354	YDR449C	Utp6	0.99
MI:0496	P53251	YGR081C	Slx9	MI:0498	P36009	YKL078W	Dhr2	0.99
MI:0496	P53251	YGR081C	Slx9	MI:0498	P53254	YGR090W	Utp22	0.99
MI:0496	Q04500	YML093W	Utp14	MI:0498	P25586	YCL059C	Krr1	0.99
MI:0496	Q04500	YML093W	Utp14	MI:0498	P53254	YGR090W	Utp22	0.99
MI:0496	Q02931	YPL126W	Utp17	MI:0498	P53276	YGR128C	Utp8	0.99
MI:0496	P40362	YJL069C	Utp18	MI:0498	P15790	YIL035C	Cka1	0.99
MI:0496	P40362	YJL069C	Utp18	MI:0498	P20448	YJL033W	Dbp4	0.99
MI:0496	P40362	YJL069C	Utp18	MI:0498	Q06344	YDR365C	Esf1	0.99
MI:0496	P40362	YJL069C	Utp18	MI:0498	Q12481	YOR287C	Rrp36	0.99
MI:0496	P40362	YJL069C	Utp18	MI:0498	P53254	YGR090W	Utp22	0.99
MI:0496	Q99207	YDL148C	Utp2	MI:0498	P38333	YBR247C	Enp1	0.99
MI:0496	Q99207	YDL148C	Utp2	MI:0498	Q12136	YDL153C	Utp3	0.99
MI:0496	P53254	YGR090W	Utp22	MI:0498	P36009	YKL078W	Dhr2	0.99
MI:0496	P53254	YGR090W	Utp22	MI:0498	P53254	YGR090W	Utp22	0.99
MI:0496	P53254	YGR090W	Utp22	MI:0498	Q02354	YDR449C	Utp6	0.99
MI:0496	Q12339	YOR004W	Utp23	MI:0498	Q12339	YOR004W	Utp23	0.99
MI:0496	Q12136	YDL153C	Utp3	MI:0498	P53317	YGR251W	Dhi1	0.99
MI:0496	Q12136	YDL153C	Utp3	MI:0498	P36009	YKL078W	Dhr2	0.99
MI:0496	Q12136	YDL153C	Utp3	MI:0498	P53251	YGR081C	Slx9	0.99
MI:0496	Q12136	YDL153C	Utp3	MI:0498	P53254	YGR090W	Utp22	0.99
MI:0496	Q04177	YDR398W	Utp5	MI:0498	P53254	YGR090W	Utp22	0.99
MI:0496	Q02354	YDR449C	Utp6	MI:0498	P36009	YKL078W	Dhr2	0.99
MI:0496	Q02354	YDR449C	Utp6	MI:0498	Q06344	YDR365C	Esf1	0.99
MI:0496	Q02354	YDR449C	Utp6	MI:0498	P53743	YNR054C	Esf2	0.99
MI:0496	Q02354	YDR449C	Utp6	MI:0498	P40079	YER127W	Lcp5	0.99
MI:0496	Q02354	YDR449C	Utp6	MI:0498	Q12481	YOR287C	Rrp36	0.99
MI:0496	Q02354	YDR449C	Utp6	MI:0498	P53254	YGR090W	Utp22	0.99
MI:0496	P53335	YGR280C	Gno1	MI:0498	P53131	YGL120C	Prp43	0.99
MI:0496	P32899	YHR148W	Imp3	MI:0498	P47083	YJR002W	Mpp10	0.99
MI:0496	P47083	YJR002W	Mpp10	MI:0498	Q02354	YDR449C	Utp6	0.99
MI:0496	P40362	YJL069C	Utp18	MI:0498	Q06078	YLR409C	Utp21	0.99
MI:0496	P40362	YJL069C	Utp18	MI:0498	Q02354	YDR449C	Utp6	0.99
MI:0496	Q99207	YDL148C	Utp2	MI:0498	Q06287	YLR186W	Emg1	0.99
MI:0496	P15790	YIL035C	Cka1	MI:0498	P19454	YOR061W	Cka2	1
MI:0496	P38333	YBR247C	Enp1	MI:0498	P53251	YGR081C	Slx9	1
MI:0496	P47083	YJR002W	Mpp10	MI:0498	P32899	YHR148W	Imp3	1
MI:0496	Q02354	YDR449C	Utp6	MI:0498	P47083	YJR002W	Mpp10	1
MI:0496	Q02354	YDR449C	Utp6	MI:0498	P40362	YJL069C	Utp18	1
MI:0496	P15790	YIL035C	Cka1	MI:0498	P43639	YGL019W	Ckb1	1
MI:0496	P19454	YOR061W	Cka2	MI:0498	P15790	YIL035C	Cka1	1
MI:0496	P19454	YOR061W	Cka2	MI:0498	P43639	YGL019W	Ckb1	1
MI:0496	P43639	YGL019W	Ckb1	MI:0498	P15790	YIL035C	Cka1	1
MI:0496	P43639	YGL019W	Ckb1	MI:0498	P19454	YOR061W	Cka2	1
MI:0496	Q06344	YDR365C	Esf1	MI:0498	P53743	YNR054C	Esf2	1
MI:0496	P53743	YNR054C	Esf2	MI:0498	Q06344	YDR365C	Esf1	1
MI:0496	P53941	YNL075W	Imp4	MI:0498	P47083	YJR002W	Mpp10	1
MI:0496	P47083	YJR002W	Mpp10	MI:0498	P53941	YNL075W	Imp4	1
MI:0496	P47083	YJR002W	Mpp10	MI:0498	Q12136	YDL153C	Utp3	1
MI:0496	P39990	YEL026W	Snu13	MI:0498	P15646	YDL014W	Nop1	1
MI:0496	P42945	YJL109C	Utp10	MI:0498	Q02931	YPL126W	Utp17	1
MI:0496	Q12220	YLR129W	Utp12	MI:0498	Q05946	YLR222C	Utp13	1
MI:0496	Q05946	YLR222C	Utp13	MI:0498	Q12220	YLR129W	Utp12	1
MI:0496	Q02931	YPL126W	Utp17	MI:0498	P42945	YJL109C	Utp10	1
MI:0496	P40498	YIL091C	Utp25	MI:0498	Q12136	YDL153C	Utp3	1
MI:0496	Q12136	YDL153C	Utp3	MI:0498	P47083	YJR002W	Mpp10	1
MI:0496	Q12136	YDL153C	Utp3	MI:0498	P40498	YIL091C	Utp25	1
MI:0496	Q12136	YDL153C	Utp3	MI:0498	Q12136	YDL153C	Utp3	1
MI:0496	Q02354	YDR449C	Utp6	MI:0498	Q06078	YLR409C	Utp21	1
MI:0496	Q02354	YDR449C	Utp6	MI:0498	Q12136	YDL153C	Utp3	1
MI:0496	Q02354	YDR449C	Utp6	MI:0498	Q02354	YDR449C	Utp6	1
MI:0496	P53276	YGR128C	Utp8	MI:0498	Q02931	YPL126W	Utp17	1
MI:0496	P53276	YGR128C	Utp8	MI:0498	P38882	YHR196W	Utp9	1
MI:0496	P38882	YHR196W	Utp9	MI:0498	P53276	YGR128C	Utp8	1
