# Supplementary material
Source: HighWire-hosted journal article supplement (doi:10.1101/rna.062927.117)
Supplement: Supplemental_Table_4_IPs.xlsx [file Supplemental_Table_4_IPs.xlsx]

## Sheet: Sheet1
Accession Number Uniprot	ORF	Bait	Size (kDa)	Accession Number Uniprot	ORF	Prey	Size (kDa)	Confidence Score	Positive IP?
P15790	YIL035C	p414GPD-3xFLAG-Cka1	44.7	Q12481	YOR287C	p415GPD-3xHA-Rrp36	36.1	0.77	Y
P15790	YIL035C	p414GPD-3xFLAG-Cka1	44.7	P43639	YGL019W	p415GPD-3xHA-Ckb1	32.2	1	Y
P15790	YIL035C	p414GPD-3xFLAG-Cka1	44.7	P20448	YJL033W	p415GPD-3xHA-Dbp4	87.2	0.77	Y
P15790	YIL035C	p414GPD-3xFLAG-Cka1	44.7	P53317	YGR251W	p415GPD-3xHA-Dhi1	22.3	0.84	N
P15790	YIL035C	p414GPD-3xFLAG-Cka1	44.7	Q06344	YDR365C	p415GPD-3xHA-Esf1	72.4	0.92	N
P15790	YIL035C	p414GPD-3xFLAG-Cka1	44.7	P53335	YGR280C	p415GPD-3xHA-Gno1	31.3	0.99	Y
P15790	YIL035C	p414GPD-3xFLAG-Cka1	44.7	P32899	YHR148W	p415GPD-3xHA-Imp3	21.9	0.84	N
P19454	YOR061W	p414GPD-3xFLAG-Cka2	39.4	P43639	YGL019W	p415GPD-3xHA-Ckb1	32.2	1	Y
P19454	YOR061W	p414GPD-3xFLAG-Cka2	39.4	P53317	YGR251W	p415GPD-3xHA-Dhi1	22.3	0.84	N
Q03532	YMR290C	p414GPD-3xFLAG-Has1	56.7	P20448	YJL033W	p415GPD-3xHA-Dbp4	87.2	0.92	Y
Q03532	YMR290C	p414GPD-3xFLAG-Has1	56.7	P53743	YNR054C	p415GPD-3xHA-Esf2	36.4	0.99	Y
Q03532	YMR290C	p414GPD-3xFLAG-Has1	56.7	P47083	YJR002W	p415GPD-3xHA-Mpp10	66.9	0.99	Y
Q03532	YMR290C	p414GPD-3xFLAG-Has1	56.7	P53866	YNL224C	p415GPD-3xHA-Pfa1	86.9	0.99	Y
Q03532	YMR290C	p414GPD-3xFLAG-Has1	56.7	Q12481	YOR287C	p415GPD-3xHA-Rrp36	36.1	0.63	Y
Q03532	YMR290C	p414GPD-3xFLAG-Has1	56.7	Q12136	YDL153C	p415GPD-3xHA-Utp3	70.2	0.99	Y
P47083	YJR002W	p414GPD-3xFLAG-Mpp10	66.9	P32899	YHR148W	p415GPD-3xHA-Imp3	21.9	1	Y
P47083	YJR002W	p414GPD-3xFLAG-Mpp10	66.9	P53941	YNL075W	p415GPD-3xHA-Imp4	33.5	1	Y
P47083	YJR002W	p414GPD-3xFLAG-Mpp10	66.9	Q12136	YDL153C	p415GPD-3xHA-Utp3	70.2	1	Y
Q06132	YLR336C	p414GPD-3xFLAG-Sgd1	102.8	Q12099	YDR021W	p415GPD-3xHA-Fal1	45.2	0.99	Y
P53254	YGR090W	p414GPD-3xFLAG-Utp22	140.5	P20448	YJL033W	p415GPD-3xHA-Dbp4	87.2	0.63	Y
P53254	YGR090W	p414GPD-3xFLAG-Utp22	140.5	P25368	YCL031C	p415GPD-3xHA-Rrp7	34.5	0.84	Y
P20448	YJL033W	p415GPD-3xHA-Dbp4	87.2	P20448	YJL033W	p414GPD-3xFLAG-Dbp4	87.2	0.78	Y
P20448	YJL033W	p415GPD-3xHA-Dbp4	87.2	P53743	YNR054C	p414GPD-3xFLAG-Esf2	36.4	0.99	Y
P20448	YJL033W	p415GPD-3xHA-Dbp4	87.2	Q12136	YDL153C	p414GPD-3xFLAG-Utp3	70.2	0.8	Y
P38719	YHR169W	p415GPD-3xHA-Dbp8	47.9	P36009	YKL078W	p414GPD-3xFLAG-Dhr2	82.7	0.77	Y
P38719	YHR169W	p415GPD-3xHA-Dbp8	47.9	P53743	YNR054C	p414GPD-3xFLAG-Esf2	36.4	0.99	Y
P38719	YHR169W	p415GPD-3xHA-Dbp8	47.9	P53254	YGR090W	p414GPD-3xFLAG-Utp22	140.5	0.68	Y
P38719	YHR169W	p415GPD-3xHA-Dbp8	47.9	Q12136	YDL153C	p414GPD-3xFLAG-Utp3	70.2	0.75	N
P53317	YGR251W	p415GPD-3xHA-Dhi1	22.3	P36009	YKL078W	p414GPD-3xFLAG-Dhr2	82.7	0.99	Y
P53317	YGR251W	p415GPD-3xHA-Dhi1	22.3	P53254	YGR090W	p414GPD-3xFLAG-Utp22	140.5	0.78	N
P53317	YGR251W	p415GPD-3xHA-Dhi1	22.3	Q12136	YDL153C	p414GPD-3xFLAG-Utp3	70.2	0.92	Y
P36009	YKL078W	p415GPD-3xHA-Dhr2	82.7	P36009	YKL078W	p414GPD-3xFLAG-Dhr2	82.7	0.99	Y
P36009	YKL078W	p415GPD-3xHA-Dhr2	82.7	P53941	YNL075W	p414GPD-3xFLAG-Imp4	33.5	0.75	Y
P36009	YKL078W	p415GPD-3xHA-Dhr2	82.7	P53254	YGR090W	p414GPD-3xFLAG-Utp22	140.5	0.92	Y
P38333	YBR247C	p415GPD-3xHA-Enp1	55.1	P36009	YKL078W	p414GPD-3xFLAG-Dhr2	82.7	0.84	Y
P38333	YBR247C	p415GPD-3xHA-Enp1	55.1	P32899	YHR148W	p414GPD-3xFLAG-Imp3	21.9	0.84	Y
P38333	YBR247C	p415GPD-3xHA-Enp1	55.1	P53941	YNL075W	p414GPD-3xFLAG-Imp4	33.5	0.84	Y
P38333	YBR247C	p415GPD-3xHA-Enp1	55.1	Q12481	YOR287C	p414GPD-3xFLAG-Rrp36	36.1	0.63	Y
P38333	YBR247C	p415GPD-3xHA-Enp1	55.1	Q06078	YLR409C	p414GPD-3xFLAG-Utp21	104.8	0.84	N
P38333	YBR247C	p415GPD-3xHA-Enp1	55.1	P53254	YGR090W	p414GPD-3xFLAG-Utp22	140.5	0.84	Y
Q06344	YDR365C	p415GPD-3xHA-Esf1	72.4	P20448	YJL033W	p414GPD-3xFLAG-Dbp4	87.2	0.92	Y
Q06344	YDR365C	p415GPD-3xHA-Esf1	72.4	P53743	YNR054C	p414GPD-3xFLAG-Esf2	36.4	1	Y
Q06344	YDR365C	p415GPD-3xHA-Esf1	72.4	P53254	YGR090W	p414GPD-3xFLAG-Utp22	140.5	0.87	Y
P53335	YGR280C	p415GPD-3xHA-Gno1	31.3	P53131	YGL120C	p414GPD-3xFLAG-Prp43	87.5	0.99	Y
P32899	YHR148W	p415GPD-3xHA-Imp3	21.9	P36009	YKL078W	p414GPD-3xFLAG-Dhr2	82.7	0.68	N
P32899	YHR148W	p415GPD-3xHA-Imp3	21.9	Q12136	YDL153C	p414GPD-3xFLAG-Utp3	70.2	0.78	Y
P47083	YJR002W	p415GPD-3xHA-Mpp10	66.9	Q12136	YDL153C	p414GPD-3xFLAG-Utp3	70.2	1	Y
P47083	YJR002W	p415GPD-3xHA-Mpp10	66.9	P36009	YKL078W	p414GPD-3xFLAG-Dhr2	82.7	0.99	N
P47083	YJR002W	p415GPD-3xHA-Mpp10	66.9	P47083	YJR002W	p414GPD-3xFLAG-Mpp10	66.9	0.65	Y
P47083	YJR002W	p415GPD-3xHA-Mpp10	66.9	P42945	YJL109C	p414GPD-3xFLAG-Utp10	200	0.7	Y
P47083	YJR002W	p415GPD-3xHA-Mpp10	66.9	P53254	YGR090W	p414GPD-3xFLAG-Utp22	140.5	0.75	Y
P47083	YJR002W	p415GPD-3xHA-Mpp10	66.9	Q02354	YDR449C	p414GPD-3xFLAG-Utp6	52.4	0.99	Y
P53866	YNL224C	p415GPD-3xHA-Pfa1	86.9	P36009	YKL078W	p414GPD-3xFLAG-Dhr2	82.7	0.99	N
P53866	YNL224C	p415GPD-3xHA-Pfa1	86.9	P32899	YHR148W	p414GPD-3xFLAG-Imp3	21.9	0.7	Y
P53866	YNL224C	p415GPD-3xHA-Pfa1	86.9	P25586	YCL059C	p414GPD-3xFLAG-Krr1	37.1	0.99	Y
P53866	YNL224C	p415GPD-3xHA-Pfa1	86.9	P53131	YGL120C	p414GPD-3xFLAG-Prp43	87.5	0.99	Y
P53866	YNL224C	p415GPD-3xHA-Pfa1	86.9	P53254	YGR090W	p414GPD-3xFLAG-Utp22	140.5	0.63	Y
P53866	YNL224C	p415GPD-3xHA-Pfa1	86.9	Q02354	YDR449C	p414GPD-3xFLAG-Utp6	52.4	0.84	N
P53131	YGL120C	p415GPD-3xHA-Prp43	87.5	P36009	YKL078W	p414GPD-3xFLAG-Dhr2	82.7	0.63	Y
P53131	YGL120C	p415GPD-3xHA-Prp43	87.5	Q12136	YDL153C	p414GPD-3xFLAG-Utp3	70.2	0.63	N
P45818	YGL171W	p415GPD-3xHA-Rok1	63.7	P53254	YGR090W	p414GPD-3xFLAG-Utp22	140.5	0.99	Y
P38712	YHR065C	p415GPD-3xHA-Rrp3	56	Q12136	YDL153C	p414GPD-3xFLAG-Utp3	70.2	0.7	N
Q12481	YOR287C	p415GPD-3xHA-Rrp36	36.1	Q12136	YDL153C	p414GPD-3xFLAG-Utp3	70.2	0.94	Y
P25635	YCR057C	p415GPD-3xHA-Utp1	103.9	Q12136	YDL153C	p414GPD-3xFLAG-Utp3	70.2	0.7	N
P40362	YJL069C	p415GPD-3xHA-Utp18	66.4	P53317	YGR251W	p414GPD-3xFLAG-Dhi1	22.3	0.84	N
P40362	YJL069C	p415GPD-3xHA-Utp18	66.4	P36009	YKL078W	p414GPD-3xFLAG-Dhr2	82.7	0.84	Y
P40362	YJL069C	p415GPD-3xHA-Utp18	66.4	P32899	YHR148W	p414GPD-3xFLAG-Imp3	21.9	0.75	Y
P40362	YJL069C	p415GPD-3xHA-Utp18	66.4	P25586	YCL059C	p414GPD-3xFLAG-Krr1	37.1	0.84	Y
P40362	YJL069C	p415GPD-3xHA-Utp18	66.4	P53254	YGR090W	p414GPD-3xFLAG-Utp22	140.5	0.99	Y
Q06512	YPR144C	p415GPD-3xHA-Utp19	63.6	Q12136	YDL153C	p414GPD-3xFLAG-Utp3	70.2	0.7	N
Q99207	YDL148C	p415GPD-3xHA-Utp2	94.3	P47083	YJR002W	p414GPD-3xFLAG-Mpp10	66.9	0.63	N
Q99207	YDL148C	p415GPD-3xHA-Utp2	94.3	P53866	YNL224C	p414GPD-3xFLAG-Pfa1	86.9	0.72	N
Q99207	YDL148C	p415GPD-3xHA-Utp2	94.3	Q06512	YPR144C	p414GPD-3xFLAG-Utp19	63.6	0.63	Y
Q99207	YDL148C	p415GPD-3xHA-Utp2	94.3	P53254	YGR090W	p414GPD-3xFLAG-Utp22	140.5	0.78	Y
P40498	YIL091C	p415GPD-3xHA-Utp25	84	P36009	YKL078W	p414GPD-3xFLAG-Dhr2	82.7	0.84	Y
P40498	YIL091C	p415GPD-3xHA-Utp25	84	P47083	YJR002W	p414GPD-3xFLAG-Mpp10	66.9	0.78	Y
P40498	YIL091C	p415GPD-3xHA-Utp25	84	Q12481	YOR287C	p414GPD-3xFLAG-Rrp36	36.1	0.84	Y
P40498	YIL091C	p415GPD-3xHA-Utp25	84	P53254	YGR090W	p414GPD-3xFLAG-Utp22	140.5	0.92	Y
P40498	YIL091C	p415GPD-3xHA-Utp25	84	Q12136	YDL153C	p414GPD-3xFLAG-Utp3	70.2	1	Y
Q12136	YDL153C	p415GPD-3xHA-Utp3	70.2	P25586	YCL059C	p414GPD-3xFLAG-Krr1	37.1	0.63	Y
Q12136	YDL153C	p415GPD-3xHA-Utp3	70.2	Q06512	YPR144C	p414GPD-3xFLAG-Utp19	63.6	0.63	N
Q12136	YDL153C	p415GPD-3xHA-Utp3	70.2	Q99207	YDL148C	p414GPD-3xFLAG-Utp2	94.3	0.94	Y
Q12136	YDL153C	p415GPD-3xHA-Utp3	70.2	Q12136	YDL153C	p414GPD-3xFLAG-Utp3	70.2	1	Y
Q12136	YDL153C	p415GPD-3xHA-Utp3	70.2	Q02354	YDR449C	p414GPD-3xFLAG-Utp6	52.4	0.76	Y
Q04177	YDR398W	p415GPD-3xHA-Utp5	72	P36009	YKL078W	p414GPD-3xFLAG-Dhr2	82.7	0.84	N
Q04177	YDR398W	p415GPD-3xHA-Utp5	72	P32899	YHR148W	p414GPD-3xFLAG-Imp3	21.9	0.63	Y
Q04177	YDR398W	p415GPD-3xHA-Utp5	72	P53254	YGR090W	p414GPD-3xFLAG-Utp22	140.5	0.99	Y
Q04177	YDR398W	p415GPD-3xHA-Utp5	72	Q04177	YDR398W	p414GPD-3xFLAG-Utp5	72	0.63	N
