# Supplementary material
Source: HighWire-hosted journal article supplement (doi:10.1101/rna.062927.117)
Supplement: Supplemental_Table_5_Negative_IPs.xlsx [file Supplemental_Table_5_Negative_IPs.xlsx]

## Sheet: Sheet1
Accession Number Uniprot	ORF	Bait	Size (kDa)	Accession Number Uniprot	ORF	Prey	Size (kDa)	Confidence Score	Positive IP?
P20448	YJL033W	p415GPD-3xHA-Dbp4	87.2	P32899	YHR148W	p414GPD-3xFLAG-Imp3	21.9	0	N
P53941	YNL075W	p415GPD-3xHA-Imp4	33.5	Q03532	YMR290C	p414GPD-3xFLAG-Has1	56.7	0	N
P38719	YHR169W	p415GPD-3xHA-Dbp8	47.9	P47077	YJL010C	p414GPD-3xFLAG-Nop9	77.7	0	N
P25368	YCL031C	p415GPD-3xHA-Rrp7	34.5	Q03532	YMR290C	p414GPD-3xFLAG-Has1	56.7	0	N
P25368	YCL031C	p415GPD-3xHA-Rrp7	34.5	Q02354	YDR449C	p414GPD-3xFLAG-Utp6	52.4	0	N
P38712	YHR065C	p415GPD-3xHA-Rrp3	56	P27476	YGR159C	p414GPD-3xFLAG-Nsr1	44.5	0	N
P20448	YJL033W	p415GPD-3xHA-Dbp4	87.2	P34247	YKL099C	p414GPD-3xFLAG-Utp11	29.8	0	N
P32899	YHR148W	p415GPD-3xHA-Imp3	21.9	P34247	YKL099C	p414GPD-3xFLAG-Utp11	29.8	0	N
P53941	YNL075W	p415GPD-3xHA-Imp4	33.5	P34247	YKL099C	p414GPD-3xFLAG-Utp11	29.8	0	N
P53866	YNL224C	p415GPD-3xHA-Pfa1	86.9	Q04177	YDR398W	p414GPD-3xFLAG-Utp5	72	0	N
P38712	YHR065C	p415GPD-3xHA-Rrp3	56	P47083	YJR002W	p414GPD-3xFLAG-Mpp10	66.9	0	N
P53335	YGR280C	p415GPD-3xHA-Gno1	31.3	P47083	YJR002W	p414GPD-3xFLAG-Mpp10	66.9	0	N
P53131	YGL120C	p415GPD-3xHA-Prp43	87.5	P25586	YCL059C	p414GPD-3xFLAG-Krr1	37.1	0	N
P40498	YIL091C	p415GPD-3xHA-Utp25	84	Q04177	YDR398W	p414GPD-3xFLAG-Utp5	72	0	N
P47083	YJR002W	p415GPD-3xHA-Mpp10	66.9	Q12481	YOR287C	p414GPD-3xFLAG-Rrp36	36.1	0	Y
