# Supplementary material
Source: HighWire-hosted journal article supplement (doi:10.1101/rna.062927.117)
Supplement: Supplemental_Table_6_Previously_Published_Interactions.xlsx [file Supplemental_Table_6_Previously_Published_Interactions.xlsx]

## Sheet: Sheet1
Bait	Prey	Experimental System	Confidence Score in this Study	Reference(s)
Cka1	Ckb1	PCA	1	Tarassov 2008
Cka1	Ckb2	PCA	0.4	Schlecht 2012
Cka2	Ckb2	PCA	0.4	Tarassov 2008
Ckb1	Cka1	PCA	1	Tarassov 2008
Ckb1	Cka2	PCA	1	Tarassov 2008 and Schlecht 2012
Ckb1	Ckb2	PCA	0.01	Tarassov 2008
Ckb2	Cka1	PCA	0.4	Tarassov 2008
Ckb2	Cka2	PCA	0.4	Tarassov 2008 and Schlecht 2012
Ckb2	Ckb1	PCA	0.25	Tarassov 2008
Enp1	Slx9	PCA	1	Tarassov 2008 and Schlecht 2012
Esf1	Utp4	PCA	0.01	Tarassov 2008
Gno1	Gno1	PCA	0.76	Tarassov 2008
Prp43	Prp43	PCA	0.52	Tarassov 2008
Rrp9	Sgd1	PCA	0.33	Tarassov 2008
Utp5	Utp4	PCA	0.85	Tarassov 2008
Utp5	Utp8	PCA	0.4	Tarassov 2008
Utp5	Utp9	PCA	0.93	Tarassov 2008
Utp5	Utp10	PCA	0.93	Tarassov 2008
Utp5	Utp15	PCA	0.85	Tarassov 2008
Utp7	Sof1	PCA	0.01	Tarassov 2008
Utp8	Utp4	PCA	0.85	Tarassov 2008
Utp8	Utp9	PCA	1	Tarassov 2008
Utp8	Utp15	PCA	0.01	Tarassov 2008
Utp10	Utp4	PCA	0.56	Tarassov 2008
Utp12	Utp1	PCA	0.69	Tarassov 2008
Utp14	Sof1	PCA	0.01	Tarassov 2008
Utp15	Utp8	PCA	0.01	Tarassov 2008
Utp15	Utp9	PCA	0.25	Tarassov 2008
Utp18	Utp4	PCA	0.4	Tarassov 2008
Utp21	Utp1	PCA	0.64	Tarassov 2008
Cka1	Cka2	Y2H	1	Albert 2016
Cka1	Ckb1	Y2H	1	Albert 2016
Cka1	Ckb2	Y2H	0.4	Albert 2016
Cka2	Cka1	Y2H	1	Uetz 2000 and Albert 2016
Cka2	Ckb1	Y2H	1	Albert 2016
Cka2	Ckb2	Y2H	0.4	Uetz 2000, Ito 2001, and Albert 2016
Ckb1	Cka1	Y2H	1	Albert 2016
Ckb1	Cka2	Y2H	1	Uetz 2000 and Albert 2016
Ckb1	Ckb1	Y2H	0.64	Albert 2016
Ckb1	Ckb2	Y2H	0.01	Uetz 2000 and Albert 2016
Ckb2	Cka1	Y2H	0.4	Uetz 2000 and Albert 2016
Ckb2	Cka2	Y2H	0.4	Uetz 2000 and Albert 2016
Ckb2	Ckb1	Y2H	0.25	Albert 2016
Ckb2	Ckb2	Y2H	0.4	Uetz 2000 and Albert 2016
Dhr1	Utp14	Y2H	0.79	Zhu 2016
Emg1	Utp2	Y2H	0.93	Liu and Thiele 2001
Esf1	Esf2	Y2H	1	Hazbun 2003
Esf2	Dpb8	Y2H	0.76	Hazbun 2003 and Granneman 2006
Esf2	Esf1	Y2H	1	Hazbun 2003
Has1	Has1	Y2H	0.57	McCann 2015
Imp4	Mpp10	Y2H	1	Ito 2001 and Gallagher and Baserga 2004
Mpp10	Imp3	Y2H	1	Lee and Baserga 1999
Mpp10	Imp4	Y2H	1	Lee and Baserga 1999
Mpp10	Utp3	Y2H	1	Charette and Baserga 2010
Nop1	Nop1	Y2H	0.88	Boulon 2008
Nop1	Nop5/58	Y2H	0.01	Boulon 2008
Nop1	Nop56	Y2H	0.71	Boulon 2008
Nop1	Snu13	Y2H	0.64	Gonzales 2005 and Boulon 2008
Nop5/58	Nop56	Y2H	0.25	Boulon 2008
Nop5/58	Snu13	Y2H	0.25	Gonzales 2005 and Boulon 2008
Nop56	Nop1	Y2H	0.95	Gonzales 2005 and Boulon 2008
Nop56	Nop56	Y2H	0.4	Boulon 2008
Nop56	Snu13	Y2H	0.64	Gonzales 2005 and Boulon 2008
Prp43	Gno1	Y2H	0.64	Lebaron 2005 and Banerjee 2015
Prp43	Pfa1	Y2H	0.64	Pandit 2009 and Banerjee 2015
Rcl1	Bms1	Y2H	0.01	Wegierski 2001
Rok1	Fal1	Y2H	0.01	Park 2002
Rrp7	Utp22	Y2H	0.01	Albert 2016
Rrp9	Nop1	Y2H	0.01	Boulon 2008
Snu13	Nop1	Y2H	1	Gonzales 2005 and Boulon 2008
Snu13	Nop5/58	Y2H	0.01	Boulon 2008
Snu13	Nop56	Y2H	0.95	Boulon 2008
Utp1	Utp18	Y2H	0.4	Champion 2008
Utp1	Utp21	Y2H	0.64	Champion 2008
Utp3	Mpp10	Y2H	1	Charette and Baserga 2010
Utp3	Prp43	Y2H	0.01	Ito 2001
Utp3	Utp3	Y2H	1	Charette and Baserga 2010
Utp3	Utp6	Y2H	0.76	Charette and Baserga 2010
Utp3	Utp21	Y2H	0.85	Charette and Baserga 2010
Utp3	Utp25	Y2H	1	Charette and Baserga 2010
Utp4	Utp5	Y2H	0.01	Freed and Baserga 2010
Utp4	Utp8	Y2H	0.01	Freed and Baserga 2010
Utp5	Utp4	Y2H	0.85	Freed and Baserga 2010
Utp5	Utp10	Y2H	0.93	Freed and Baserga 2010
Utp5	Utp15	Y2H	0.85	Freed and Baserga 2010
Utp6	Mpp10	Y2H	1	Charette and Baserga 2010
Utp6	Utp3	Y2H	1	Charette and Baserga 2010
Utp6	Utp6	Y2H	1	Champion 2008 and Charette and Baserga 2010
Utp6	Utp18	Y2H	1	Champion 2008 and Zhang 2016a
Utp6	Utp21	Y2H	1	Champion 2008 and Charette and Baserga 2010
Utp8	Utp9	Y2H	1	Huang 2010 and Freed and Baserga 2010
Utp8	Utp17	Y2H	1	Freed and Baserga 2010
Utp9	Utp8	Y2H	1	Huang 2010 and Freed and Baserga 2010
Utp10	Utp8	Y2H	0.64	Freed and Baserga 2010
Utp10	Utp17	Y2H	1	Freed and Baserga 2010
Utp12	Utp13	Y2H	1	Champion 2008
Utp12	Utp21	Y2H	0.25	Champion 2008 and Zhang 2016a
Utp13	Utp12	Y2H	1	Champion 2008
Utp15	Utp5	Y2H	0.01	Uetz 2000 and Freed and Baserga 2010
Utp15	Utp9	Y2H	0.25	Freed and Baserga 2010
Utp15	Utp10	Y2H	0.01	Freed and Baserga 2010
Utp17	Utp10	Y2H	1	Freed and Baserga 2010
Utp17	Utp17	Y2H	0.64	Freed and Baserga 2010
Utp21	Utp1	Y2H	0.64	Champion 2008 and Zhang 2016a
Utp21	Utp6	Y2H	0.93	Champion 2008 and Charette and Baserga 2010
Utp21	Utp18	Y2H	0.64	Ito 2001, Yu 2008, Champion 2008, Zhang 2014, and Zhang 2016a
Utp22	Utp7	Y2H	0.4	Lin 2013 and Albert 2016
Utp25	Mpp10	Y2H	0.78	Charette and Baserga 2010 and Goldfeder and Oliveira 2010
Utp25	Utp3	Y2H	1	Charette and Baserga 2010 and Goldfeder and Oliveira 2010
Utp25	Utp21	Y2H	0.64	Charette and Baserga 2010
