# Supplementary material
Source: HighWire-hosted journal article supplement (doi:10.1101/rna.062927.117)
Supplement: Supplemental_Table_7_Sedimentation_Profiles.xlsx [file Supplemental_Table_7_Sedimentation_Profiles.xlsx]

## Sheet: Sheet1
Protein	Gradient Sedimentation Result	Figure Location
Bms1	Not tested	-
Dbp4	Unable to detect on gradient reproducibly	-
Dbp8	Discrete peak	Supplemental Figure 3
Dhr1	Found in all fractions	Data not shown
Dhr2	Discrete peak	Figure 5A
Fal1	Found in all fractions	Supplemental Figure 3
Has1	Discrete peak	Supplemental Figure 3
Prp43	Discrete peak	Supplemental Figure 3
Rok1	Heaviest fractions	Supplemental Figure 3
Rrp3	Unable to construct strain	-
Sen1	Unable to construct strain	-
Cka1	Not tested	-
Cka2	Not tested	-
Ckb1	Not tested	-
Ckb2	Not tested	-
Emg1	Discrete peak	Figure 5A
Nop1	Not tested	-
Rcl1	Not tested	-
Utp24	Heaviest fractions	Figure 5B
Dhi1	Unable to construct strain	-
Enp1	Discrete peak	Figure 5A
Esf1	Discrete peak	Supplemental Figure 3
Esf2	Discrete peak	Supplemental Figure 3
Fyv7	Not tested	-
Gno1	Unable to constrct strain	-
Imp3	Not tested	-
Imp4	Not tested	-
Kre33	Only found in totals	Data not shown
Krr1	Heaviest fractions	Figure 5B
Lcp5	Unable to construct strain	-
Ltv1	Not tested	-
Mpp10	Not tested	-
Mrd1	Not tested	-
Mrt4	Not tested	-
Nop5/58	Not tested	-
Nop6	Not tested	-
Nop9	Heaviest fractions	Supplemental Figure 3
Nop56	Unable to detect on gradient reproducibly	-
Nsr1	Discrete peak	Figure 5A
Pfa1	Unable to construct strain	-
Pol5	Found in all fractions	Supplemental Figure 3
Rrp5	Discrete peak	Supplemental Figure 3
Rrp7	Heaviest fractions	Data not shown
Rrp9	Unable to detect on gradient reproducibly	Data not shown
Rrp36	Unable to construct strain	-
Sgd1	Unable to construct strain	-
Slx9	Unable to construct strain	-
Snu13	Not tested	-
Sof1	Not tested	-
Utp1	Discrete peak	Supplemental Figure 3
Utp2	Heaviest fractions	Supplemental Figure 3
Utp3	Heaviest fractions	Supplemental Figure 3
Utp4	Not tested	-
Utp5	Discrete peak	Supplemental Figure 3
Utp6	Discrete peak	Supplemental Figure 3
Utp7	Heaviest fractions	Figure 5B
Utp8	Discrete peak	Supplemental Figure 3
Utp9	Found in all fractions	Data not shown
Utp10	Not tested	-
Utp11	Heaviest fractions	Figure 5B
Utp12	Not tested	-
Utp13	Not tested	-
Utp14	Unable to detect on gradient reproducibly	-
Utp15	Discrete peak	Supplemental Figure 3
Utp16	Discrete peak	Figure 5A
Utp17	Discrete peak	Supplemental Figure 3
Utp18	Not tested	-
Utp19	Discrete peak	Supplemental Figure 3
Utp20	Heaviest fractions	Supplemental Figure 3
Utp21	Unable to detect on gradient reproducibly	-
Utp22	Found in all fractions	Supplemental Figure 3
Utp23	Not tested	-
Utp25	Discrete peak	Figure 5A
Utp30	Heaviest fractions	Figure 5B
