# Supplementary material
Source: HighWire-hosted journal article supplement (doi:10.1101/rna.062927.117)
Supplement: Supplemental_Table_8_Bassler_comparison.xlsx [file Supplemental_Table_8_Bassler_comparison.xlsx]

## Sheet: Sheet1
Bait	Prey	Confidence Score in this study	Previously reported in literature?	Reference(s)
Dhr1	Utp3	0.85	N	-
Emg1	Emg1	0	N	-
Emg1	Utp2	0.93	Y	Liu and Thiele 2001
Esf1	Dbp4	0.92	N	-
Esf1	Esf2	1	Y	Hazbun 2003
Esf1	Rrp3	0	N	-
Esf2	Dbp8	0.76	Y	Hazbun 2003 and Granneman 2006
Esf2	Esf1	1	Y	Hazbun 2003
Imp3	Mpp10	0.99	N	-
Imp4	Enp1	0	N	-
Imp4	Mpp10	1	Y
Imp4	Utp19	0.24	N	-
Utp19	Utp19	0	N	-
Utp19	Utp14	0	N	-
Utp19	Utp2	0.32	N	-
Rcl1	Bms1	0.01	Y	Wegierski 2001
Rrp3	Esf1	0.63	N	-
Sgd1	Bms1	0.41	N	-
Sgd1	Fal1	0.99	N	-
Sgd1	Lcp5	0.99	N	-
Utp14	Utp2	0.34	N	-
Utp14	Utp3	0.77	N	-
Utp15	Utp5	0.01	Y	Uetz 2000 and Freed and Baserga 2010
Utp18	Utp6	0.99	N	-
Utp2	Emg1	0.99	N	-
Utp2	Enp1	0.99	N	-
Utp2	Has1	0.56	N	-
Utp2	Utp19	0.63	N	-
Utp2	Utp14	0	N	-
Utp2	Utp15	0.17	N	-
Utp2	Utp3	0.99	N	-
Utp21	Utp1	0.64	Y	Champion 2008, Tarassov 2008, and Zhang 2016a
Utp21	Utp18	0.64	Y	Ito 2001, Yu 2008, Champion 2008, Zhang 2014, and Zhang 2016a
Utp22	Utp14	0.56	N	-
Utp3	Esf2	0.24	N	-
Utp3	Mpp10	1	Y	Charette and Baserga 2010
Utp3	Utp19	0.63	N	-
Utp3	Utp14	0	N	-
Utp3	Utp2	0.94	N	-
Utp3	Utp3	1	Y	Charette and Baserga 2010
Utp5	Utp15	0.85	Y	Freed and Baserga 2010 and Tarassov 2008
Utp5	Utp8	0.4	Y	Tarassov 2008
Utp6	Utp14	0	N	-
Utp6	Utp18	1	Y	Champion 2008 and Zhang 2016a
Utp7	Utp14	0	N	-
