# Supplementary material
Source: HighWire-hosted journal article supplement (doi:10.1101/rna.062927.117)
Supplement: Supplemental_Table_9_Oligos_used_in_study.xlsx [file Supplemental_Table_9_Oligos_used_in_study.xlsx]

## Sheet: Sheet1
Oligo Name	Oligo Sequence (5'-3')
Dbp8.TAP.F	GAAAAAGACAGCAAAAGAAGAAGCAAAATGACGGGAAAAGTTTGCGCTCTTCCATGGAAAAGAGAAG
Dbp8.TAP.R	AGTATCCAGATTGTACGATATGTACGTCTTTAAATCTTATTTAGAATTTTTACGACTCACTATAGGG
Dhr2.TAP.F	TTGTCACTAATGCAGCCGCTGTAGCAAAGCAAAAAGTTTCTGATTCAAAATCCATGGAAAAGAGAAG
Dhr2.TAP.R	TTACATTAAATGCCTTTATATACAATAAAAATGCGCTAAGAGTAGGTGACTACGACTCACTATAGGG
Emg1.V5.Hph.F	TTGCATGTTCTAAATTTTGCCATGGCGCTGAAGATGCTTGGAATATTTTAGGGGGAGGCGGGGGTGGA
Emg1.V5.HpH.R	CGTATATTGACTGTTTATTATACAAAGAGGATGCCAAGTAGACTTAAACAGAATTCGAGCTCGTTTTCG
Enp.TAP.R	GGGGGAAAGACCGAGCGATATAAAATTGATGAAAAATTGATATTACAGCATACGACTCACTATAGGG
Enp1.TAP.F	AGTTTGTTGATCCACAGGAAGCTAATGATGATTTAATGATTGATGTCAATTCCATGGAAAAGAGAAG
Esf1.TAP.F	TGGTAAACAAGTTGAAAAAGAAAAGCAAATCATCCAAGAAGGTAAAGGTTTCCATGGAAAAGAGAAG
Esf1.TAP.R	CATATCTATTTGTATTCAAGTTTCATTTAAATACTATTTCATTGACTGCTTACGACTCACTATAGGG
Esf2.FLAG.F	AGCAATCCTCTGGGTCCAAAGACTTGGGTAATGTTCTCACCAATTTACTAAGGGAACAAAAGCTGGAG
Esf2.FLAG.R	AAACGTGCTAAATGACAGGTTGTGTTTATATATTTGTTATTGATTCTATACTATAGGGCGAATTGGGT
Fal1.TAP.F	TCTATTCTATCAAAATAAATCCGATGCCAGCAAATTTTGCAGAATTATCATCCATGGAAAAGAGAAG
Fal1.TAP.R	ATGGATGAGACTCTCTTAACTTGTTTATGTAGGTATATGTTCTCTATATTTACGACTCACTATAGGG
Has1.TAP.F	TTGGTGCCAGTGGAAAAACGCCAAATACCAAAAGACGTAAAACTCATAAGTCCATGGAAAAGAGAAG
Has1.TAP.R	GTGTTGGTTCCACGTACACATTAATAGCATTAAAAATTGATCCTCTGAAATACGACTCACTATAGGG
Krr1.TAP.F	CAAAAGATTTCATAGCTCCGGAAGAAGAAGCATACAAGCCAAACCAAAATTCCATGGAAAAGAGAAG
Krr1.TAP.R	TGTTTCTATATATATATAGACATATATGAAGGATTCCGTAGCGGTGTAAATACGACTCACTATAGGG
Nop9.FLAG.F	GAAATAATTCGAAGGAAGGAAGCGCCTTCAAAAAGCAAAAGCACTATAGAAGGGAACAAAAGCTGGAG
Nop9.FLAG.R	ATTGCATAATTCTATAATTTACATCAGTACAGTAGTAACATATTATCCAACTATAGGGCGAATTGGGT
Nsr1.TAP.F	GCAGATCAAGAAATACCGCTTCTTTCGCTGGTTCAAAGAAAACATTTGATTCCATGGAAAAGAGAAG
Nsr1.TAP.R	TTAACGTAAAAAGAGAAAAAATTGAAATTGAAATTCATTTCATTTTCTCATACGACTCACTATAGGG
Pol5.FLAG.F	GATTTCATCAATTGGCTATCTTCAAAAAAGCAAACTGTAATGGATAAGGAAAGGGAACAAAAGCTGGAG
Pol5.FLAG.R	AAGATCAACATACATAATCCGATTTTGAGGAGTGATAAAATATACTTAGACTATAGGGCGAATTGGGT
Prp43.TAP.F	ACGAGTTGAAACAAGGTAAAAACAAAAAGAAGAGTAAGCACTCCAAGAAATCCATGGAAAAGAGAAG
Prp43.TAP.R	CCTATAAATTTATATAAATCTATTTTTTTTTTTTTTTCGACACAAAATGTTACGACTCACTATAGGG
Rok1.TAP.F	CATCCAAAAGAAGAAAAAATGAAGAACTTTCAAAAAAACATTTCTCGAAATCCATGGAAAAGAGAAG
Rok1.TAP.R	AAAAACTACTAATCATATATACATGTCTTGCATACGCACGTTTGTTTATATACGACTCACTATAGGG
Rrp5.TAP.F	CTAAAGCTACTGAGTATGTCGCTAGCCATGAATCTCAAAAAGCAGACGAATCCATGGAAAAGAGAAG
Rrp5.TAP.R	TTACAAACTTAGCCATTTATATTACTTTACAGTTAAAAATCCATCAGGAATACGACTCACTATAGGG
Utp1.FLAG.F	CTAATGAAAATGATTCCAGTGATGAAGAAGAAAATGAGAAAGAGCTTCCTAGGGAACAAAAGCTGGAG
Utp1.FLAG.R	TGGGGAATACATGATGTGAATGTGCATAAATAGAGGACAGTGAATATTTTCTATAGGGCGAATTGGGT
Utp11.TAP.F	TAGACTCTTCAGGAAAAATTTCATTTAAATGGAAGAAACAACGGAAACGTTCCATGGAAAAGAGAAG
Utp11.TAP.R	ACGGAACGTCTGCCTGATTCACTTATATATACTATATAGATGGTAAAAATTACGACTCACTATAGGG
Utp15.FLAG.F	AGTCTAAAGAAGCTCAAAGAATTGAAGGTATGCTTCAACTTTTAACGAGTAGGGAACAAAAGCTGGAG
Utp15.FLAG.R	TGAATATCTATAAAATAGATACAAATTAAAATCTATATGCTAATATTTCCCTATAGGGCGAATTGGGT
Utp16.TAP.F	TCATACGTTCAAAAGACCGTTGGCTAAATAGAAAGGCTTTGAATAAAGGGTCCATGGAAAAGAGAAG
Utp16.TAP.R	TGATTAATTTTGTGATTGTACTATTATTTTATTATGTTGTATGCTATATATACGACTCACTATAGGG
Utp19.FLAG.F	ATAGCGAAGCGTCATCCCAAGGTAACGTCTACTTGCCTGGGGTAGCATGGAGGGAACAAAAGCTGGAG
Utp19.FLAG.R	TATAAATGTATATATACACACTTTTAAAACTTCGTTGTTCATCTTCGCTTCTATAGGGCGAATTGGGT
Utp2.V5.Hph.F	CGGAAAAAAACAAGTATGAAAGAGAAAGAAAACTACGTGGCGGAAAGAAAGGGGGAGGCGGGGGTGGA
Utp2.V5.Hph.R	TCTGAGAAGCCTAATAAGAAAAAAAGAGGTTAATAAATTATTATTATTGGGAATTCGAGCTCGTTTTCGA
Utp20.V5.Hph.F	AAAAGGATGAAAATGGGTATTATCAAAGACGTAACAAAAGAAAGAGAGCCGGGGGAGGCGGGGGTGGA
Utp20.V5.Hph.R	AACTTGGATTTTTTATTCATTAGTATACATGTTATAAAGATATATTACAGGAATTCGAGCTCGTTTTCGA
Utp22.FLAG.F	ATGAGATTGCTGCATTCGGGAATGACATGGTTATAAATTTTGAGACAGATAGGGAACAAAAGCTGGAG
Utp22.FLAG.R	TATTTAATATTATACAGATACTTCTAAAAGTTATGATTTTGTTGTTTATTCTATAGGGCGAATTGGGT
Utp24.FLAG.F	TGAGCGTAGGCGGTCACGCATACGTCATTGAAAAATTGCCAGATGTCTTTAGGGAACAAAAGCTGGAG
Utp24.FLAG.R	ATAAACCAAAAACATTGCACTACATACTTAAAGAGTGAATACACAGTAGTCTATAGGGCGAATTGGGT
Utp25.FLAG.F	AAAGAGCAGCTGTATTATCGCATGCACAAAAGGAAATTTATGAATTTAAAAGGGAACAAAAGCTGGAG
Utp25.FLAG.R	ATGATAATATTCTTCATTGTGTACTCTATACATTGTGGCAGTGCTAATATCTATAGGGCGAATTGGGT
Utp3.FLAG.F	AAAAGACAGGTATCAAGAAGGGTTTGACGAGGTCTGTTAAATTCAAGAATAGGGAACAAAAGCTGGAG
Utp3.FLAG.R	CAAAAATTTTGACACCACTACTTGGGTAAATACTACATATGTAAATTTTTCTATAGGGCGAATTGGGT
Utp30.TAP.F	CAGAGGCTAGAGAAAATCAGAAAAATGAAGATCTGAGTGATATTAAATTGTCCATGGAAAAGAGAAG
Utp30.TAP.R	TTTTCATTGGGAGTGTTTAAATACCGTATTTAAAAGATGATGCTTTAATTTACGACTCACTATAGGG
Utp5.FLAG.F	AGCAGAGCGACGGCGAGGAGGAAGCCGGATATAGTGACGTTGAGATGGAAAGGGAACAAAAGCTGGAG
Utp5.FLAG.R	AGATTATTTTTGTATTCTGATGCGTGAAAGCATTTTATGCATGATATCCTCTATAGGGCGAATTGGGT
Utp6.FLAG.F	CAGAAGATGATCCTAGGTATAAAATTCTAGATTTAATTATCAGCAAACTTAGGGAACAAAAGCTGGAG
Utp6.FLAG.R	AAACATTTATCTGATATGTAATTGCATTTATAAAATGTACAGTACCGCATCTATAGGGCGAATTGGGT
Utp7.TAP.F	TTCAGAAGACCACAAGGATGTCATCGAAGAGGCATTGAGCAGATTCGGCTCCATGGAAAAGAGAAG
Utp7.TAP.R	TATATATACATACATAATCATTTAAGTTTTTTTTTTAAAGATATTTCGATTACGACTCACTATAGGG
