# Supplementary material
Source: HighWire-hosted journal article supplement (doi:10.1101/rna.062927.117)
Supplement: Supplemental_Table_10_Strains_used_in_study.xlsx [file Supplemental_Table_10_Strains_used_in_study.xlsx]

## Sheet: Sheet1
Strain	Genotype	Source
PJ69-4a	MATa trp1-901 leu2-3 112 ura3-52 his3200 gal4Δ gal80Δ LYS2::GAL1-HIS3 GAL2-ADE2 met2::GAL7-lacZ	James et al. 1996
PJ69-4α	MATα trp1-901 leu2-3 112 ura3-52 his3-200 gal4Δ gal80Δ LYS2::GAL1-HIS3 GAL2-ADE2 met2::GAL7-lacZ	James et al. 1996
Y2H Gold	MATa trp1-901 leu203 112 ura3-52 his3-200 gal4Δ gal80Δ LYS2::GAL1UAS-Gal1TATA-His3 GAL2UAS-Gal2TATA-Ade2 URA3::MEL1UAS-Mel1TATA-AUR1-C MEL1	Clontech
Y187	MATα trp1-901 leu2-3 112 ura3-52 his3-200 gal4Δ gal80Δ met-URA3::Gal1-LacZ, MEL1	Harper et al. 1993
YPH499	MATa ura3-52 lys3-5 ade2-10 trp1-Δ63 his3-Δ200 leu2- Δ1	Sikorski and Hieter, 1989
NOY504	MATα, rpa12::LEU2, leu2-3, 112, ura3-1, trp-1, his3-11, CAN1-100	Nogi et al. 1992
YKW100	MATa ura3-52 his3-Δleu2 lys2-801amber trp1-Δ63 u3aΔ UASGAL:U3A::URA3 u3bΔ::LEU2	Wehner, et al. 2002
NOY504 Utp1-3xFLAG	MATα, rpa12::LEU2, leu2-3, 112, ura3-1, trp-1, his3-11, CAN1-100 UTP1-3xFLAG::KANMX6	This study
YPH499 Dpb8-TAP	MATa ura3-52 lys3-5 ade2-10 trp1-Δ63 his3-Δ200 leu2- Δ1 DBP8-TAP::TRP1	This study
YPH499 Esf2-3xFLAG	MATa ura3-52 lys3-5 ade2-10 trp1-Δ63 his3-Δ200 leu2- Δ1 ESF2-3xFLAG::KANMX6	This study
YPHP499 Utp19-3xFLAG	MATa ura3-52 lys3-5 ade2-10 trp1-Δ63 his3-Δ200 leu2- Δ1 UTP19-3xFLAG::KANMX6	This study
YPH499 Utp6-3xFLAG	MATa ura3-52 lys3-5 ade2-10 trp1-Δ63 his3-Δ200 leu2- Δ1 UTP6-3xFLAG::KANMX6	This study
YPH499 Utp5-3xFLAG	MATα, rpa12::LEU2, leu2-3, 112, ura3-1, trp-1, his3-11, CAN1-100 UTP5-3xFLAG::KANMX6	This study
YKW100 Utp17-TAP Utp7-3xHA	MATa ura3-52 his3-Δleu2 lys2-801amber trp1-Δ63 u3aΔ UASGAL:U3A::URA3 u3bΔ::LEU2 UTP17-TAP::TRP UTP7-3xHA::ADE	Baserga Lab Yeast Stocks
YKW100 Utp17-TAP Utp8-3xHA	MATa ura3-52 his3-Δleu2 lys2-801amber trp1-Δ63 u3aΔ UASGAL:U3A::URA3 u3bΔ::LEU2 UTP17-TAP::TRP UTP8-3xHA::ADE	Baserga Lab Yeast Stocks
YPH499 Prp43-TAP	MATa ura3-52 lys3-5 ade2-10 trp1-Δ63 his3-Δ200 leu2- Δ1 PRP43-TAP::TRP1	This study
YPH499 Utp15-3xFLAG	MATa ura3-52 lys3-5 ade2-10 trp1-Δ63 his3-Δ200 leu2- Δ1 UTP15-3xFLAG::KANMX6	This study
YPH499 Rrp5-TAP	MATa ura3-52 lys3-5 ade2-10 trp1-Δ63 his3-Δ200 leu2- Δ1 RRP5-TAP::TRP1	This study
YPH499 Esf1-TAP	MATa ura3-52 lys3-5 ade2-10 trp1-Δ63 his3-Δ200 leu2- Δ1 ESF1-TAP::TRP1	This study
YPH499 Has1-TAP	MATa ura3-52 lys3-5 ade2-10 trp1-Δ63 his3-Δ200 leu2- Δ1 HAS1-TAP::TRP1	This study
YPH499 Nop9-3xFLAG	MATa ura3-52 lys3-5 ade2-10 trp1-Δ63 his3-Δ200 leu2- Δ1 NOP9-3xFLAG::KANMX6	This study
YPH499 Rok1-TAP	MATa ura3-52 lys3-5 ade2-10 trp1-Δ63 his3-Δ200 leu2- Δ1 ROK1-TAP::TRP1	This study
NOY504 Utp3-3xFLAG	MATα, rpa12::LEU2, leu2-3, 112, ura3-1, trp-1, his3-11, CAN1-100 UTP3-3xFLAG::KANMX6	This study
YPH499 Utp20-V5	MATa ura3-52 lys3-5 ade2-10 trp1-Δ63 his3-Δ200 leu2- Δ1 UTP20-V5::HPHMX4	This study
YPH499 Utp2-V5	MATa ura3-52 lys3-5 ade2-10 trp1-Δ63 his3-Δ200 leu2- Δ1 UTP2-V5::HPHMX4	This study
YPH499 Utp22-3xFLAG	MATa ura3-52 lys3-5 ade2-10 trp1-Δ63 his3-Δ200 leu2- Δ1 UTP22-3xFLAG::KANMX6	This study
YPH499 Fal1-TAP	MATa ura3-52 lys3-5 ade2-10 trp1-Δ63 his3-Δ200 leu2- Δ1 FAL1-TAP::TRP1	This study
YPH499 Pol5-3xFLAG	MATa ura3-52 lys3-5 ade2-10 trp1-Δ63 his3-Δ200 leu2- Δ1 POL5-3xFLAG::KANMX6	This study
YPH499 Emg1-V5	MATa ura3-52 lys3-5 ade2-10 trp1-Δ63 his3-Δ200 leu2- Δ1 EMG1-V5::HPHMX4	This study
YPH499 Utp25-3xFLAG	MATa ura3-52 lys3-5 ade2-10 trp1-Δ63 his3-Δ200 leu2- Δ1 UTP25-3xFLAG::KANMX6	This study
YPH499 Enp1-TAP	MATa ura3-52 lys3-5 ade2-10 trp1-Δ63 his3-Δ200 leu2- Δ1 ENP1-TAP::TRP1	This study
YPH499 Nsr1-TAP	MATa ura3-52 lys3-5 ade2-10 trp1-Δ63 his3-Δ200 leu2- Δ1 NSR1-TAP::TRP1	This study
YPH499 Dhr2-TAP	MATa ura3-52 lys3-5 ade2-10 trp1-Δ63 his3-Δ200 leu2- Δ1 DHR2-TAP::TRP1	This study
YPH499 Utp16-TAP	MATa ura3-52 lys3-5 ade2-10 trp1-Δ63 his3-Δ200 leu2- Δ1 UTP16-TAP::TRP1	This study
YPH499 Utp7-TAP	MATa ura3-52 lys3-5 ade2-10 trp1-Δ63 his3-Δ200 leu2- Δ1 UTP7-TAP::TRP1	This study
YPH499 Krr1-TAP	MATa ura3-52 lys3-5 ade2-10 trp1-Δ63 his3-Δ200 leu2- Δ1 KRR1-TAP::TRP1	This study
YPH499 Utp11-TAP	MATa ura3-52 lys3-5 ade2-10 trp1-Δ63 his3-Δ200 leu2- Δ1 UTP11-TAP::TRP1	This study
NOY504 Utp24-3xFLAG	MATα, rpa12::LEU2, leu2-3, 112, ura3-1, trp-1, his3-11, CAN1-100 UTP24-3xFLAG::KANMX6	This study
YPH499 Utp30-TAP	MATa ura3-52 lys3-5 ade2-10 trp1-Δ63 his3-Δ200 leu2- Δ1 UTP30-TAP::TRP1	This study
